# Supplementary material for: Multi-purpose overcoating layers based on PVA/silane hybrid composites for highly transparent, flexible, and durable AgNW/PEDOT:PSS films
Source: Royal Society of Chemistry journal article supplement (doi:10.1039/c5ra27311k), 2016-01-01
Supplement: c5ra27311k1.pdf [file c5ra27311k1.pdf]

## Electronic Supplementary Information file

### Multi-purpose Overcoating Layers Based on PVA/Silane Hybrid Composites for Highly Transparent, Flexible, and Durable AgNW/PEDOT:PSS Films

Seyul Kim,<sup>a</sup> Ahra Cho,<sup>a</sup> Soyeon Kim,<sup>a</sup> Wonseok Cho,<sup>a</sup> Moon Hyun Chung,<sup>a</sup> Felix Sunjoo Kim<sup>\*b</sup> and Jung Hyun Kim<sup>\*a</sup>

<sup>a</sup> Department of Chemical and Biomolecular Engineering, Yonsei University, 50 Yonsei-ro, Seodaemun-gu, Seoul 120-749, Republic of Korea.  
E-mail: jayhkim@yonsei.ac.kr

<sup>b</sup> School of Chemical Engineering and Materials Science, Chung-Ang University, 84 Heukseok-ro, Dongjak-gu, Seoul 156-756, Republic of Korea.  
E-mail: fskim@cau.ac.kr

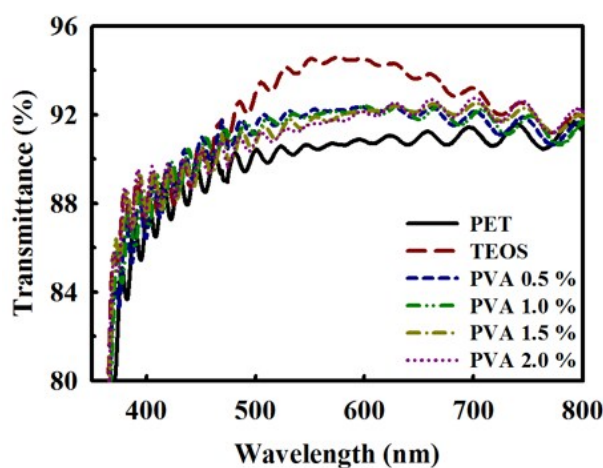

**Fig. S1** The transmittance spectra of PET and TEOS+PVA hybrid overcoating layers of PET with different PVA compositions.

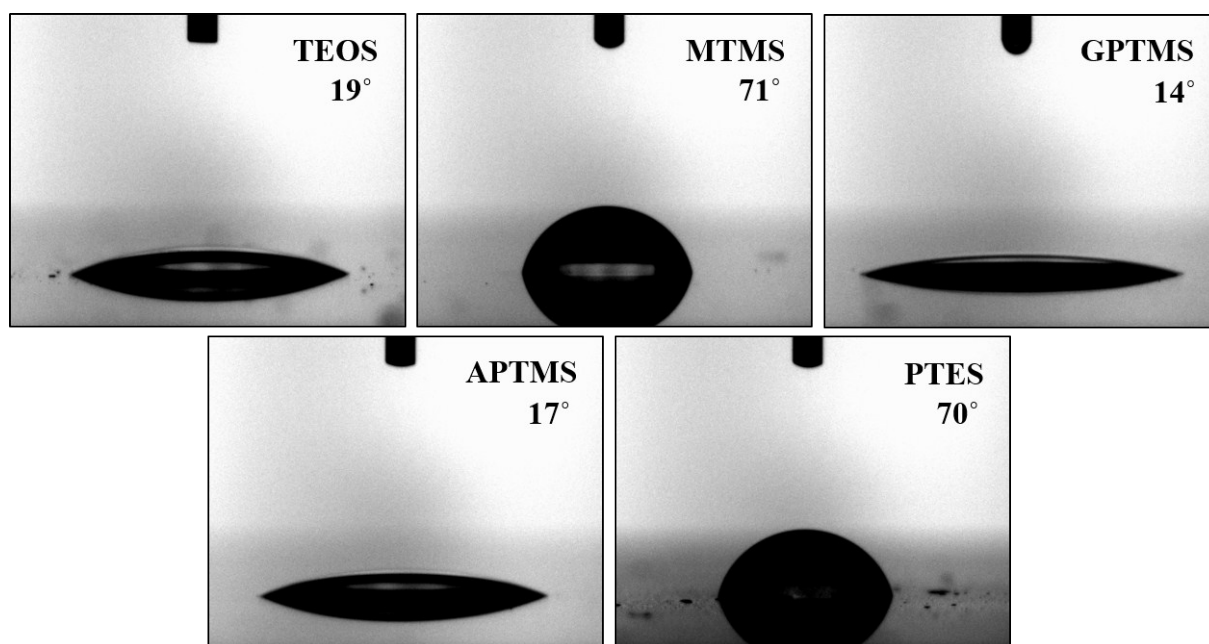

**Fig. S2.** The water contact angle images of various silica overcoating layers.

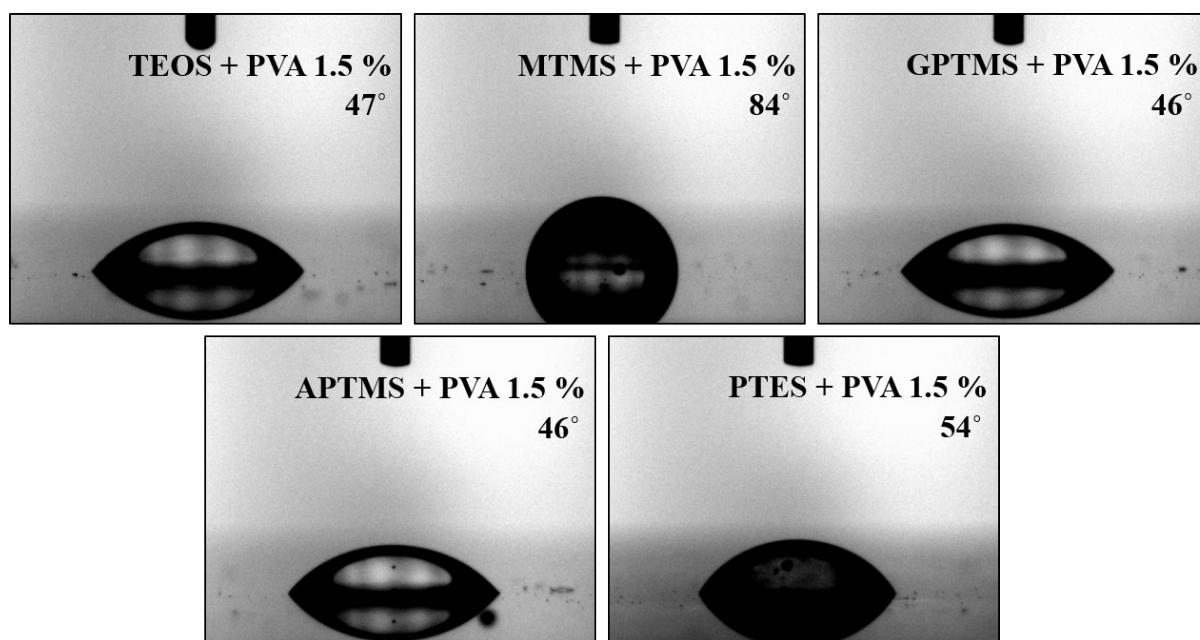

**Fig. S3** The water contact angle images of hybrid overcoating layers prepared using various silica sols.

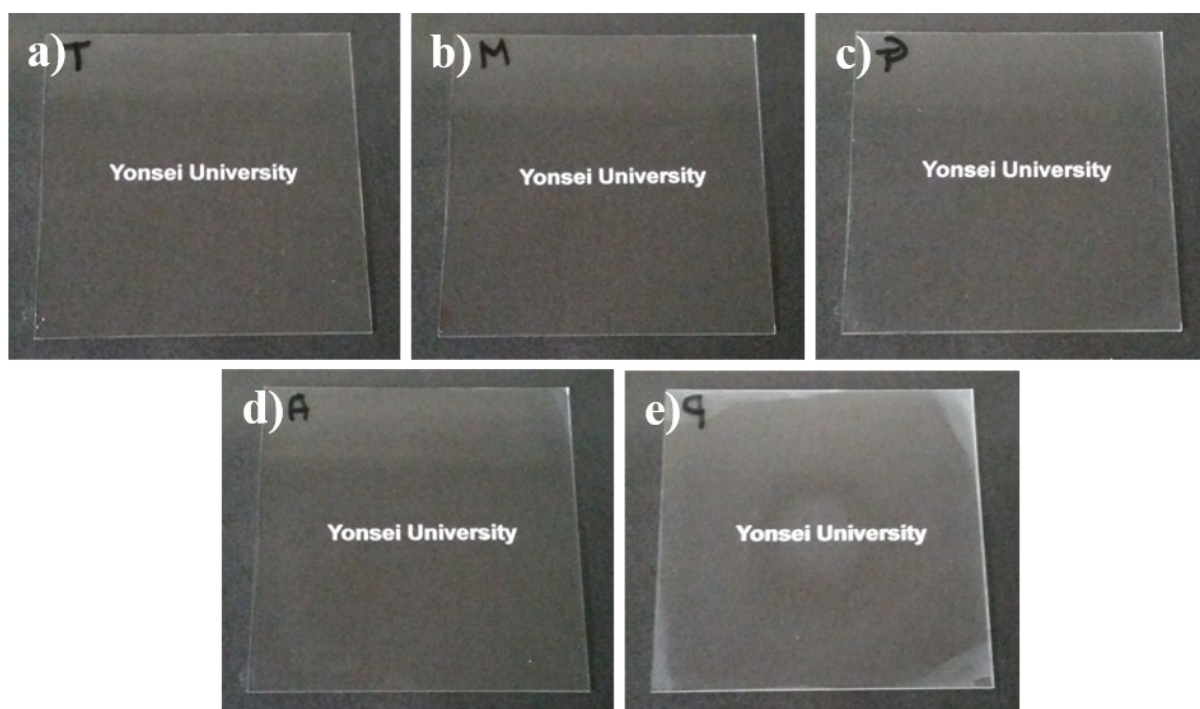

**Fig. S4** The photographic images of a) TEOS, b) MTMS, c) GPTMS, d) APTMS, and e) PTES film.
